# Depression and Depression Care in Diabetes

## Relationship to perceived discrimination in African Americans

JULIE WAGNER, PHD  
GINA ABBOTT, PHD

**D**epression is more prevalent in both African Americans and Caucasians with diabetes (1) than in nondiabetic control subjects (2), and it is associated with worse diabetes outcomes (3,4). Prospective studies (5) show that everyday encounters with discrimination predict subsequent depressive symptoms in nondiabetic individuals. When discrimination is perceived, specifically in health care, it may also interfere with depression care. This study investigated perceived discrimination, depressive symptoms, and depression care in diabetic African Americans.

### RESEARCH DESIGN AND METHODS

Participants were African-American adults with diabetes attending 2004–2006 American Diabetes Association health fairs in northeastern U.S. cities. Attendees responded to a sign advertising “Research for African Americans with diabetes.” After informed consent, participants completed questionnaires and provided fingerprick blood samples for A1C assessment (6). Participants were paid \$5.00 and given A1C results with referrals to community health centers.

Demographic questions included age, sex, insurance, primary care provider, and socioeconomic status (SES), which was assessed with income and education. A medical history questionnaire asked about physician-diagnosed disorders (including depression) and whether medication was

taken for each disorder. These questions were modeled after the Centers for Disease Control’s survey questions (7,8) for patient report of physician-diagnosed disorders.

Participants completed three additional questionnaires, as follows. The Center for Epidemiological Studies Depression (CESD) scale (9) is a 20-item measure of depressive symptoms. A score of  $>21$  discriminates between depressed and nondepressed individuals in medical populations (10,11).  $\alpha$  in this sample was 0.87.

The Schedule of Racist Events (SRE) (12) is an 18-item questionnaire that measures frequency and stressfulness of racial discrimination situations (e.g., in salary, housing, by store clerks) over a lifetime and in the last year. One item was added that assessed perceived discrimination in health care settings. Lifetime frequency scores were used in analyses.  $\alpha$  in this sample was 0.91.

The John Henryism scale (13) is a 12-item questionnaire that measures active psychological coping, which has been shown (14) to moderate physiological and psychological responses to discrimination.  $\alpha$  in this sample was 0.91. All analyses controlled for age, sex, SES, diabetes type, and A1C using SPSS version 12.0.

**RESULTS**—Data were provided by 120 African Americans with diabetes. The typical participant was female, aged 56 years, had type 2 diabetes, and was in suboptimal glycemic control (Table 1).

Average total lifetime frequency score on the SRE was 34.7 (mean). Item scores ranged from 1.3 to 2.6, and 6% of participants reported never experiencing discrimination. These data indicate slightly lower but comparable levels of racism relative to a large, representative sample of nondiabetic African Americans (15) (mean 42.3, item score range 2.1–2.9, and 2% answering never).

In linear regression, SRE frequency scores and covariates as a group predicted depressive symptoms [ $F(6,99) = 3.16$ ,  $P < 0.01$ ,  $R^2 = 0.17$ , adjusted  $R^2 = 0.13$ ]. Higher SRE frequency scores independently predicted higher CESD scores [ $F(5,98) = 3.88$ ,  $P < 0.01$ ]. Higher A1C and female sex were also independent predictors ( $P < 0.05$ ). Effects were not modified by coping.

In logistic regression, SRE frequency scores and covariates as a group distinguished participants with CESD scores  $>21$  from those with scores  $\leq 21$  [ $\chi^2(6) = 16.19$ ,  $P < 0.05$ , Cox & Snell  $R^2 = 0.15$ ]. The Hosmer & Lemeshow index was not significant, indicating acceptable model fit ( $P = 0.16$ ). Higher SRE frequency scores independently predicted greater likelihood of CESD scores  $>21$  (odds ratio [OR] 1.07 [95% CI 1.01–1.13]  $P < 0.05$ ). Older age significantly decreased odds of elevated symptoms (0.93 [0.87–0.99],  $P < 0.05$ ). Effects were not modified by coping.

In logistic regression, SRE frequency scores and covariates as a group distinguished participants who reported physician-diagnosed depression from participants who did not [ $\chi^2(7) = 16.37$ ,  $P < 0.05$ ,  $R^2 = 0.15$ , Hosmer & Lemeshow  $P = 0.64$ ]. Higher SRE frequency scores independently predicted greater likelihood of patient-reported, physician-diagnosed depression (OR 1.06 [95% CI 1.00–1.18]  $P < 0.05$ ). Higher CESD scores were also an independent predictor (1.10 [1.02–1.18],  $P < 0.05$ ). Effects were not modified by coping.

In logistic regression, perceived discrimination in health care settings and covariates as a group distinguished participants who had used antidepressants from those who had not.

From the Division of Behavioral Sciences and Community Health, University of Connecticut Health Center, Farmington, Connecticut.

Address correspondence and reprint requests to Julie Wagner, MC3910, University of Connecticut Health Center, 263 Farmington Ave., Farmington, CT 06030. E-mail: juwagner@uchc.edu.

Received for publication 18 August 2006 and accepted in revised form 30 October 2006.

**Abbreviations:** CESD, Center for Epidemiological Studies Depression; SES, socioeconomic status; SRE, Schedule of Racist Events.

A table elsewhere in this issue shows conventional and Système International (SI) units and conversion factors for many substances.

DOI: 10.2337/dc06-1756

© 2007 by the American Diabetes Association.

The costs of publication of this article were defrayed in part by the payment of page charges. This article must therefore be hereby marked “advertisement” in accordance with 18 U.S.C. Section 1734 solely to indicate this fact.

Table 1—Descriptive demographic statistics

|                                       | Mean $\pm$ SD<br>or % |
|---------------------------------------|-----------------------|
| Age (years)                           | 55.7 $\pm$ 11.6       |
| Female                                | 74.2                  |
| Education                             |                       |
| Less than high school                 | 10.1                  |
| High school graduate<br>or equivalent | 18.5                  |
| Technical training or<br>part college | 36.9                  |
| College graduate                      | 34.4                  |
| Annual income                         |                       |
| <\$20,000                             | 27.3                  |
| \$20,001–40,000                       | 28.3                  |
| \$40,001–60,000                       | 26.4                  |
| >\$60,000                             | 18.0                  |
| Type of diabetes                      |                       |
| Type 2 diabetes                       | 88.3                  |
| Age at diabetes<br>diagnosis (years)  | 45.4 $\pm$ 13.5       |
| Duration of diabetes<br>(years)       | 10.1 $\pm$ 9.9        |
| Diabetes treatment                    |                       |
| Diet only                             | 12.5                  |
| Oral agents                           | 55.8                  |
| Insulin only                          | 15.8                  |
| Oral agents and<br>insulin injections | 15.8                  |
| A1C (%)                               | 7.6 $\pm$ 1.8         |
| CESD scale                            | 11.2 $\pm$ 9.7        |
| SRE frequency                         | 34.7 $\pm$ 11.6       |
| SRE stressfulness                     | 32.3 $\pm$ 14.9       |

sants from those who had not [ $\chi^2$  (7) = 15.95,  $P < 0.05$ ,  $R^2 = 0.37$ , Hosmer & Lemeshow  $P = 0.20$ ]. Higher frequency scores on perceived discrimination in health care settings independently predicted decreased likelihood of taking antidepressants (OR 0.16 [95% CI 0.03–0.86],  $P < 0.05$ ). There were trends for higher SES ( $P = 0.07$ ) and higher A1C ( $P = 0.05$ ) to predict greater likelihood of using antidepressants. Effects were not modified by coping.

SRE frequency scores did not vary by sex. However, SRE stressfulness scores were higher for women (33.1  $\pm$  15.3) than men (29.5  $\pm$  12.5) after controlling for covariates [ $F$  (5,98) = 4.14,  $P < 0.05$ ].

**CONCLUSIONS**— Our main finding is that perceived discrimination is related to depression in African Americans with diabetes. A higher occurrence of perceived discrimination was related to higher depressive symptoms, likelihood

of clinically significant symptoms, and likelihood of patient-reported, physician-diagnosed depression. While men and women reported similar frequency of discriminatory events, these events were experienced as more stressful to women, although it should be noted that we had few male participants.

Perceptions of discrimination within health care settings were associated with not taking antidepressants. Individuals who perceived discrimination in their health care system may have had more depressive symptoms, but those same individuals may have been less trusting of providers or the medications they recommended. Implementing pharmacotherapy for depression may be challenging in these individuals. Practitioners are encouraged to pursue cultural competence training in order to avoid behaviors that can be perceived as discriminatory to patients.

Apart from perceived discrimination, other risk factors for depression indicators in this study were consistent with past reports, including female sex, higher A1C, and younger age. Higher SES and higher A1C were marginally associated with using antidepressants.

Surprisingly, coping did not buffer the association between discrimination and depression outcomes. This was likely due to low power. Alternatively, John Henryism is a specific type of coping, and it may be that other psychological resources, such as social support or spirituality, may be important in buffering the effects of discrimination.

Several limitations should be noted. The recruitment strategy may have produced a nonrepresentative sample, as suggested by the slightly lower endorsement of racist events relative to other published reports. Diagnosis and medication data were self-reported. The direction of association could not be determined by the cross-sectional design. It is possible that depressed individuals were more likely to perceive interpersonal stimuli as noxious, and they may have been more likely to make racial attributions about the noxious stimuli. For this reason, we investigated perceived frequency (rather than stressfulness) of discriminatory events. The fact that women reported equivalent frequency but greater stressfulness of discriminatory events suggests that individuals can, to some degree, differentiate an event from their psychological response to it. Nonetheless, depression may lead to heightened perceptions of discrimination, or both may share

a common precursor, such as personality characteristics. Prospective studies of representative samples should control for personality variables and investigate additional moderators.

It may not be possible to eradicate discrimination from patients' environments. However, patients' mental health outcomes may be improved by interventions both to decrease interactions with the health care system that could be perceived as discriminatory and to help patients enhance their psychological resources to cope with perceived discrimination.

## References

1. Wagner J, Tsimikas J, Heapy A, de Groot M, Abbott G: Racial and ethnic differences in diabetic patient-reported depression symptoms, diagnosis, and treatment. *Diabetes Res Clin Pract* 75: 119–122, 2007
2. Anderson RJ, Freedland KE, Clouse RE, Lustman PJ: The prevalence of comorbid depression in adults with diabetes: a meta-analysis. *Diabetes Care* 24:1069–1078, 2001
3. Lustman PJ, Anderson RJ, Freedland KE, de Groot M, Carney RM, Clouse RE: Depression and poor glycemic control: a meta-analytic review of the literature. *Diabetes Care* 23:934–942, 2000
4. de Groot M, Anderson R, Freedland KE, Clouse RE, Lustman PJ: Association of depression and diabetes complications: a meta-analysis. *Psychosom Med* 63:619–630, 2001
5. Schulz AJ, Gravlee CC, Williams DR, Israel BA, Mentz G, Rowe Z: Discrimination, symptoms of depression, and self-rated health among African American women in Detroit: results from a longitudinal analysis. *Am J Public Health* 96: 1265–1270, 2006
6. Bayer DCA2000+ Analyzer Operating Manual. Bayer HealthCare LLC, Elkhart, IN, 2004
7. Centers for Disease Control and Prevention (CDC). Trends in cholesterol screening and awareness of high blood cholesterol—United States, 1991–2003. *MMWR Morb Mortal Wkly Rep* 54:865–870, 2005
8. Feinglass J, Nelson C, Lawther T, Chang RW: Chronic joint symptoms and prior arthritis diagnosis in community surveys: implications for arthritis prevalence estimates. *Public Health Rep* 118:230–239, 2003
9. Radloff LS: The CES-D scale: a self-report depression scale for research in the general population. *Appl Psychol Meas* 1:385–401, 1977
10. Zich JM, Attkisson CC, Greenfield TK:

- Screening for depression in primary care clinics: the CES-D and the BDI. *Int J Psychiatry Med* 20:259–277, 1990
11. Schulberg HC, Saul M, McClelland M, Ganguli M, Christy W, Frank R: Assessing depression in primary medical and psychiatric practices. *Arch Gen Psychiatry* 42: 1164–1170, 1985
  12. Landrine H, Klonoff EA: The Schedule of Racist Events: a measure of racist discrimination and a study of its negative physical and mental health consequences. *J Black Psychol* 20:59–62, 1996
  13. Myers HF: John Henryism scale for active coping. In *Handbook of Tests and Measurements for Black Populations*. Vol. 2. Jones RL, Ed. Hampton, VA, Cobb & Henry Publishers, 1996, p. 419–425
  14. Merritt MM, Bennett GG, Williams RB, Sollers JJ 3rd, Thayer JF: Low educational attainment, John Henryism, and cardiovascular reactivity to and recovery from personally relevant stress. *Psychosom Med* 66:49–55, 2004
  15. Klonoff EA, Landrine H: Cross-validation of the Schedule of Racist Events. *J Black Psychol* 25:231–54, 1999
